# Supplementary material for: Plume spreading test case for coastal ocean models
Source: Copernicus journal article supplement (doi:10.5194/gmd-2020-438), 2021-02-26
Supplement: Supplementary file 1 [file Table.docx]

| **Run** | **XX** | | **Theoretical prediction (laboratory studies)** |
| --- | --- | --- | --- |
| **Time** | 20h | 35h | **20 - 35h** |
| **Bulge maximum offshore spreading, km** |  |  | **24** |
| **Bulge length, km** |  |  | **31** |
| **Ratio length/width** |  |  | **1.3** |
| **Buoyancy layer maximum depth, m** |  |  | **0.9 - 1.8** |
| **Mean velocity (buoyancy layer), m/s** |  |  | **0.45 - 0.64** |
| **Qcc, m3/s (%)** |  |  | **~750 (25)** |
| **Maximum width, km** |  |  | **3.75 - 12** |
